# Supplementary material
Source: PubMed Central journal article supplement (PMC4816125)
Supplement: cr2015112x1.pdf [file cr2015112x1.pdf]

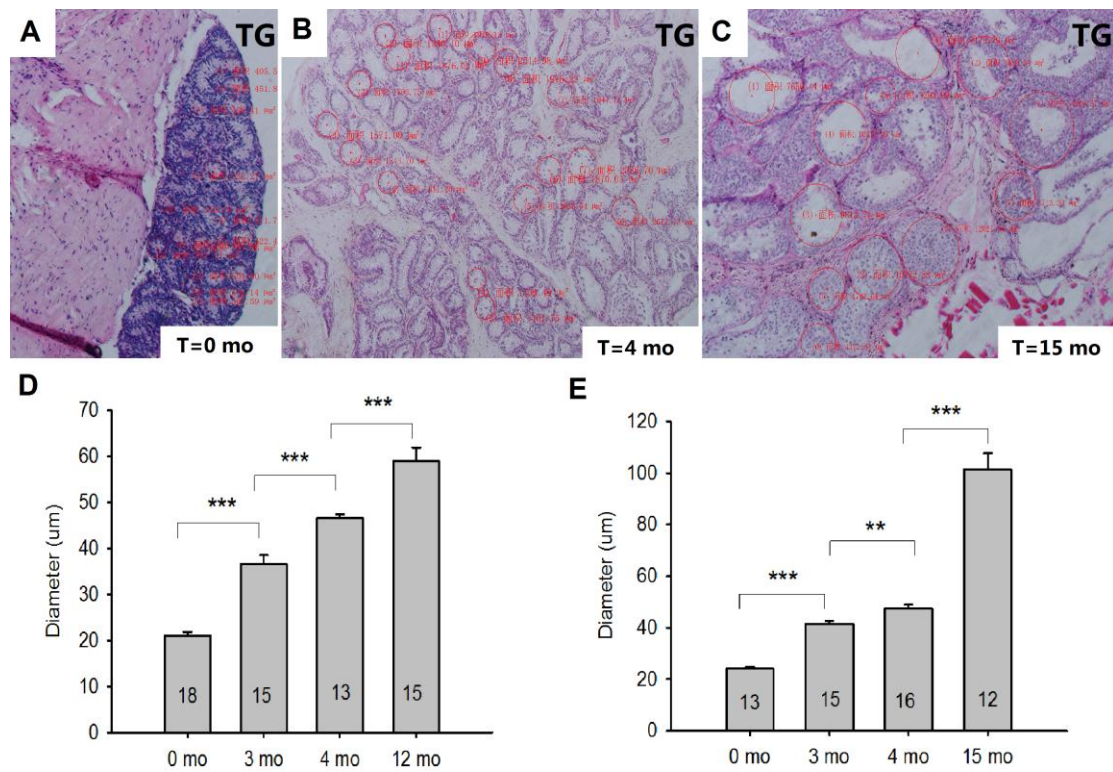

**Supplementary information, Figure S1** Growth of seminiferous tubules in xenografted testicular tissues. (A-C) Samples of testicular tissue sections from 27-month TG monkey prior to (0 month), and at 4 and 15 months after xenografting. Red circles: circular tubules chosen for analysis. (D, E) Average diameter of seminiferous tubules in xenografts prepared from 14-month old WT (D) and 27-month old TG (E) monkeys, prior to (0 month), and at 3, 4, and 15 months after xenografting. Histograms depict the average  $\pm$  s.e.m. The total number of tubules measured is shown in the column (“\*\*\*”,  $p < 0.01$ ; “\*\*\*\*”,  $p < 0.001$ ; Student’s *t*-test).
