# Supplementary material
Source: PubMed Central journal article supplement (PMC4816125)
Supplement: cr2015112x2.pdf [file cr2015112x2.pdf]

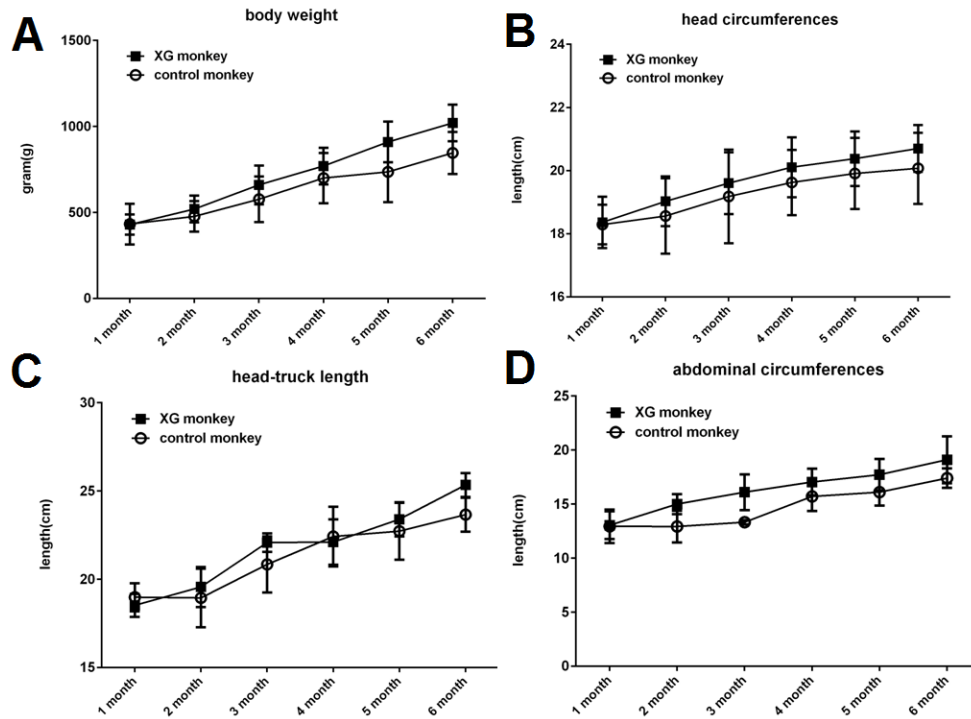

**Supplementary information, Figure S2** Growth curves based on body weight, head circumference, head-truck length and abdominal circumference showing that XG offspring were in the normal range for the first 6 months of their lives. (A) Weight growth for the first 6 months in XG and control monkey group. (B) Head circumference for the first 6 months in XG and control monkey group. (C) Head-truck length for the first 6 months in XG and control monkey group. (D) Abdominal circumference for the first 6 months in XG and control monkey group. ( $P < 0.01$ )
