# Supplementary material
Source: PubMed Central journal article supplement (PMC4816125)
Supplement: cr2015112x3.pdf [file cr2015112x3.pdf]

**Supplementary information, Table S1A** Information on xenograft sperm-derived monkeys.

| XG monkeys | Gender | Surrogates | Birth date | Condition                 |
|------------|--------|------------|------------|---------------------------|
| XG1        | ♀      | #53        | 2014/12/22 | Live                      |
| XG2        | ♂      | #245       | 2014/11/13 | Deceased on<br>2014/11/16 |
| XG3        | ♂      | #207       | 2014/11/18 | Live                      |
| XG4        | ♀      | #199       | 2014/11/27 | Live                      |
| XG5        | ♂      | #199       | 2014/11/27 | Live                      |
| XG6        | ♀      | #269       | 2014/12/7  | Live                      |
| XG7        | ♂      | #228       | 2015/4/3   | Live                      |

Supplementary information, Table S1B STR analysis of xenograft sperm-derived monkeys

| Locus    | Sperm donors |         | Oocyte donors |          |          |         |         | XG monkeys |         |         |         |         |         |         |
|----------|--------------|---------|---------------|----------|----------|---------|---------|------------|---------|---------|---------|---------|---------|---------|
|          | WT           | TG      | XG1           | XG2, XG3 | XG4, XG5 | XG6     | XG7     | XG1        | XG2     | XG3     | XG4     | XG5     | XG6     | XG7     |
| D2S1333  | 274/305      | 293/326 | 305/305       | 278/285  | 343/347  | 285/305 | 286/301 | 274/305    | 278/326 | 278/293 | 326/343 | 326/343 | 285/326 | 274/286 |
| D3S1768  | 213/213      | 204/221 | 217/221       | 213/217  | 217/226  | 200/213 | 224/229 | 213/217    | 204/217 | 213/221 | 217/221 | 217/221 | 200/221 | 213/229 |
| D4S2365  | 280/283      | 276/280 | 276/283       | 280/283  | 280/291  | 280/283 | 283/287 | 276/280    | 276/283 | 276/280 | 276/280 | 276/280 | 276/280 | 283/283 |
| D5S1457  | 123/127      | 118/123 | 119/123       | 123/123  | 123/123  | 115/127 | 119/123 | 123/123    | 118/123 | 123/123 | 118/123 | 118/123 | 115/123 | 119/123 |
| D6S501   | 175/183      | 171/179 | 183/183       | 171/179  | 179/183  | 175/187 | 179/191 | 183/183    | 171/179 | 171/179 | 179/179 | 179/179 | 171/175 | 175/179 |
| D7S513   | 194/196      | 190/198 | 206/210       | 200/202  | 202/214  | 192/194 | 198/206 | 194/206    | 190/202 | 190/202 | 190/214 | 190/202 | 190/192 | 196/198 |
| D7S794   | 150/154      | 146/154 | 146/154       | 150/154  | 154/157  | 146/150 | 145/149 | 150/154    | 150/154 | 146/154 | 146/154 | 154/157 | 150/154 | 145/150 |
| D8S1106  | 203/219      | 207/211 | 203/207       | 202/224  | 219/223  | 202/232 | 207/215 | 203/203    | 202/207 | 202/211 | 211/219 | 211/223 | 211/232 | 215/219 |
| D9S921   | 178/182      | 186/190 | 178/190       | 166/194  | 182/182  | 178/178 | 178/190 | 178/190    | 190/194 | 186/194 | 182/190 | 182/186 | 178/186 | 182/190 |
| D10S1412 | 158/161      | 161/167 | 158/158       | 158/164  | 158/161  | 158/164 | 155/161 | 158/161    | 161/164 | 158/161 | 161/167 | 158/167 | 164/167 | 158/161 |
| D11S2002 | 209/238      | 246/246 | 238/242       | 238/246  | 242/242  | 242/246 | 238/250 | 238/242    | 246/246 | 238/246 | 242/246 | 242/246 | 242/246 | 209/250 |
| D11S925  | 302/325      | 305/327 | 302/306       | 294/323  | 294/303  | 303/303 | 302/307 | 302/306    | 294/327 | 294/327 | 294/305 | 303/327 | 303/305 | 302/302 |
| D12S364  | 264/268      | 259/259 | 264/264       | 261/268  | 268/283  | 259/259 | 267/269 | 264/264    | 259/261 | 259/268 | 259/268 | 259/268 | 259/259 | 264/269 |
| D13S765  | 221/226      | 226/234 | 217/226       | 230/238  | 226/265  | 221/234 | 230/234 | 226/226    | 226/238 | 226/230 | 234/265 | 226/265 | 234/234 | 221/230 |
| D15S823  | 369/373      | 357/357 | 369/377       | 333/376  | 329/329  | 341/357 | 354/369 | 369/369    | 333/357 | 357/376 | 329/357 | 329/357 | 357/357 | 369/369 |
| D17S1300 | 255/260      | 240/256 | 244/256       | 236/247  | 240/252  | 234/263 | 239/259 | 256/260    | 236/256 | 247/256 | 240/256 | 240/240 | 256/263 | 239/255 |
| D18S537  | 174/178      | 174/174 | 166/174       | 174/178  | 178/178  | 174/174 | 168/174 | 166/174    | 174/174 | 174/174 | 174/178 | 174/178 | 174/174 | 174/178 |
| D22S685  | 236/275      | 227/236 | 338/338       | 243/247  | 275/310  | 223/323 | 302/315 | 275/338    | 227/247 | 227/243 | 236/275 | 236/275 | 223/227 | 236/315 |
| DXS2506  | 274/274      | 270/270 | 270/274       | 262/262  | 262/262  | 266/266 | 262/270 | 274/274    | 262/262 | 262/262 | 262/270 | 262/262 | 266/270 | 270/270 |
| MFGT21   | 113/113      | 113/119 | 110/110       | 123/125  | 113/117  | 105/125 | 121/123 | 110/113    | 119/125 | 113/123 | 113/113 | 113/117 | 105/113 | 121/123 |
| D6S291   | 210/212      | 206/210 | 208/210       | 208/214  | 210/214  | 208/214 | 210/215 | 210/212    | 208/210 | 206/214 | 206/210 | 210/214 | 206/208 | 210/210 |
| D6S276   | 217/223      | 221/221 | 217/229       | 216/221  | 217/218  | 216/231 | 206/217 | 217/217    | 221/221 | 216/221 | 218/221 | 218/221 | 216/221 | 217/223 |
| D6S1691  | 194/214      | 202/202 | 190/190       | 216/218  | 192/204  | 218/220 | 200/210 | 190/214    | 202/218 | 202/218 | 202/204 | 202/204 | 202/218 | 194/210 |
